# Supplementary material
Source: PubMed Central journal article supplement (PMC4026775)
Supplement: mmc1.pdf [file mmc1.pdf]

# **Conformational Flexibility of Human Casein Kinase Catalytic Subunit Explored by Metadynamics**

Aurélie Gouron, Anne Milet, and Helene Jamet\*

DCM, Equipe Chimie Théorique UMR-5250, Université Joseph Fourier Grenoble-I, Grenoble Cedex, France

## SUPPORTING MATERIAL

**Details of free energy surface reconstruction.** After metadynamics simulations, the free energy surfaces are reconstructed with the sum of the Gaussians added during the simulation as a function of CVs:

$$V_G(S(x),t) = w \sum_{\substack{t'=\tau_G, 2\tau_G, \dots \\ t' < t}} \exp\left(-\frac{(S(x) - S(x(t')))^2}{2\delta s^2}\right) \quad (1)$$

where  $V_G$  corresponds to the sum of the Gaussians centred along the trajectory ( $x$ ) in the space of the CVs,  $S(x(t'))$  is the value taken by the CV at time  $t'$ ,  $w$  is the Gaussian height,  $\delta s$  is the Gaussian width which is deposited every  $\tau_G$ .

The opposite of the sum of the Gaussians added during the simulation converges to the free energy surface  $\lim_{t \rightarrow \infty} -V_G(S(x),t) \approx F(S(x))$ .

In the well-tempered variant of metadynamics (2), the height of the Gaussian terms is

$w = w_0 e^{-\frac{V_G(S,t)}{k_B \Delta T}}$  with  $w_0$  the initial Gaussian height and  $\Delta T$  is the difference between the fictitious temperature of the CV and the temperature of the simulation. The ratio  $(T+\Delta T)/T$  is referred as bias factor.  $\Delta T \rightarrow 0$  corresponds to a ordinary MD and  $\Delta T \rightarrow \infty$  to a standard metadynamics. The bias potential does not oscillate around the FES value but slowly converges.

$$\lim_{t \rightarrow \infty} -V_G(S(x),t) \approx \frac{\Delta T}{T + \Delta T} F(S(x))$$

**Parameters of metadynamics and CVs chosen to generate the first guess path.** 6 metadynamics were performed for the p-loop equilibrium and 3 for the hinge region equilibrium. For the p-loop equilibrium, metadynamics were performed with the collapsed or the stretched p-loop conformations as starting point and with the Gaussian deposition rate of 1ps. The CVs chosen were the distance between the atoms:

d1 : Arg47 : HE – His160 : O (along the H-bond)

d2: Lys49 : NZ – Asp156:CG

d3: Tyr50:HO – Asp156:OD2 (along the H-bond)

d4 : Arg47:CZ – Asp120:CG

and the dihedral angle : an1: Arg47(C $\beta$ , C $\alpha$ ,C),Gly48(N)

| CV1 | CV2 | H<br>(kcal/mol) | $\partial$ CV1 | $\partial$ CV2 | Simulation<br>time | Starting<br>point |
|-----|-----|-----------------|----------------|----------------|--------------------|-------------------|
| d1  | d2  | 0.3             | 0.4 A          | 1 A            | 0.9 ns             | collapsed         |
| d1  | d3  | 0.3             | 0.8 A          | 0.5 A          | 0.35 ns            | collapsed         |
| d2  | d4  | 0.3             | 1 A            | 2 A            | 0.75 ns            | collapsed         |
| d1  | an1 | 0.3             | 1 A            | 0.35 rad       | 0.6 ns             | collapsed         |
| d1  | d2  | 0.3             | 1.5 A          | 2 A            | 0.45 ns            | stretched         |
| d1  | an1 | 0.3             | 1.5 A          | 0.35 rad       | 1.0 ns             | stretched         |

For the hinge region equilibrium, the open and closed hinge region were used as starting point and the deposition rate was 1 ps or 0.25 ps for the metadynamics with 2 or 3 CVs respectively. The CVs chosen were the distance between the atoms:

d5: Thr119:O - Ile164:H (along the H-bond)

d6: Phe121:H - Val162:O (along the H-bond)

and the dihedral angle an2 : Phe121(C $\gamma$ , C $\beta$ , C $\alpha$ , C)

| CV1 | CV2 | CV3 | H<br>(kcal/mol) | $\partial$ CV1 | $\partial$ CV2 | $\partial$ CV3 | Simulation<br>time | Starting<br>point |
|-----|-----|-----|-----------------|----------------|----------------|----------------|--------------------|-------------------|
| d5  | an2 |     | 0.3             | 0.3            | 0.25           |                | 0.5 ns             | open              |
| d5  | an2 | d6  | 0.3             | 0.3            | 0.25           | 0.3            | 0.5 ns             | open              |
| d5  | an2 |     | 0.3             | 0.3            | 0.25           |                | 0.4 ns             | closed            |

The parameters of the Gaussians for these metadynamics were rude because the aim is to provide intermediate frames to define the path collective variables.

**Table S1.** Atoms included in the PCV calculation.

**Figure S1.** For the p-loop equilibrium, the variable  $s(R)$ , the progression along the guess path, is plotted as a function of simulation time.

**Figure S2.** Convergence rate of free energy for the p-loop equilibrium. The difference of free energy between the two minima, the collapsed and the stretched p-loop conformations, is plotted as a function of simulation time.

**Figure S3.** For the hinge region equilibrium, the variable  $s(R)$ , the progression along the guess path, is plotted as a function of simulation time.

**Figure S4.** Convergence rate of free energy for the hinge region equilibrium. The difference of free energy between the two minima, the closed and the open hinge region conformations, is plotted as a function of simulation time.

Table S1:

For the collapsed p-loop equilibrium, the RMSD calculated for the path collective variable is between 54 atoms from the p-loop region:

Arg42 N, Ca, C ; Lys43 N, Ca, C ; Leu44, N, Ca, C ; Gly45 N, Ca, C ; Arg46 N, Ca, Cb, Cg, C ; Gly47 N, Ca, C ; Lys48 N, Ca, Cb, Cg, C ; Tyr49 N, Ca, Cb, Cg, C ; Ser50 N, Ca, C ; Glu51 N, Ca, C ; Val52 N, Ca, C ; Phe53 N, Ca, C

For the closure of the hinge region equilibrium, the RMSD calculated for the path collective variable is between 63 atoms:

Val111 N, Ca ; Phe112 N, Ca ; Glu113 N, Ca ; Hie114 N, Ca ; Val115 N, Ca, C ; Asn116 N, Ca, Cb, C ; Asn117 N, Ca, Cb, C ; Thr118 N, Ca, Cb, C ; Asp119 N, Ca, Cb, C ; Phe120 N, Ca, Cb, Cg, Cd1, Cd2, Ce1, Ce2, C ; Lys 121 N, Ca, C ; Gln122 N, Ca, C ; Leu123 N, Ca ; Tyr124 N, Ca ; Gln125 N, Ca ; Thr126 N, Ca ; Leu127 N, Ca

Figure S1:

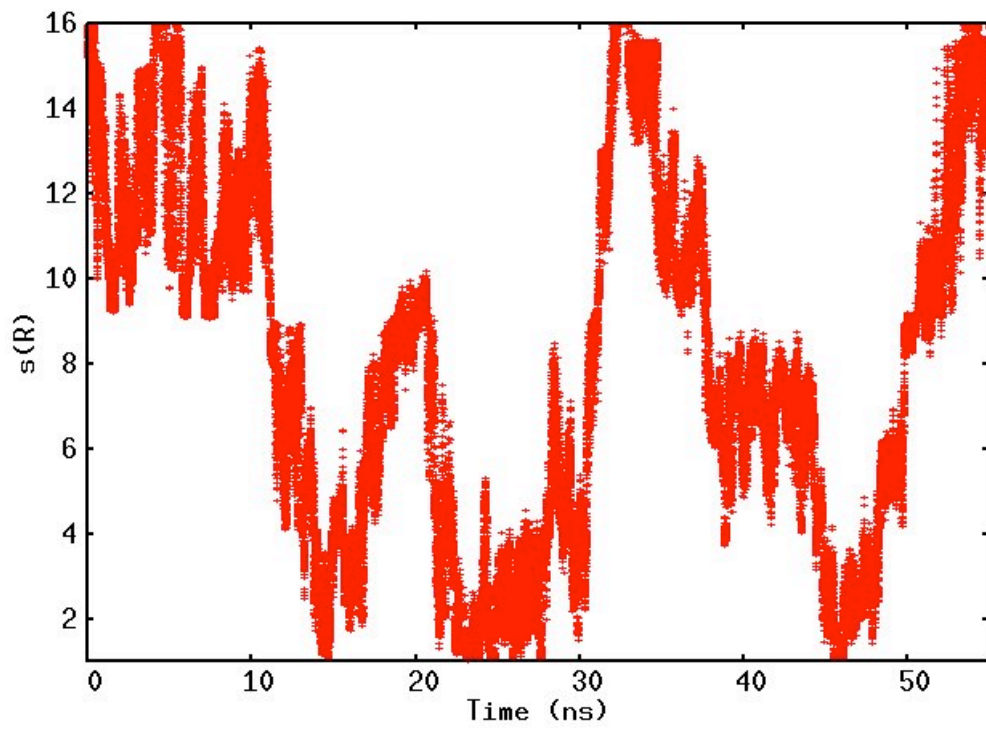

Figure S2:

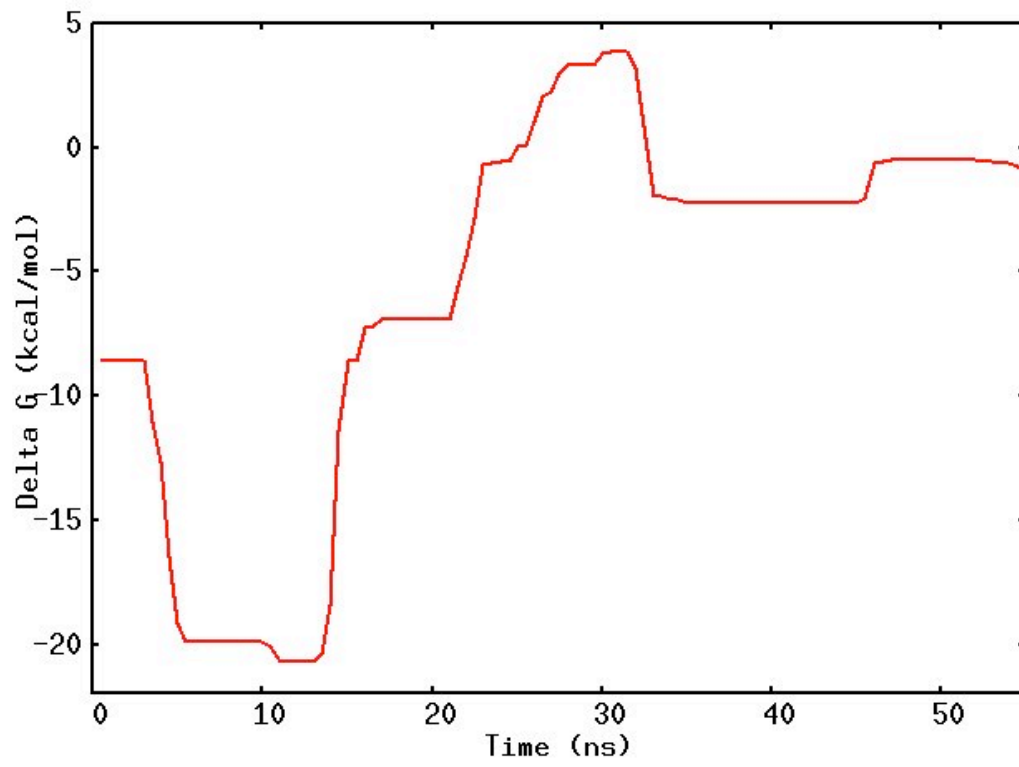

Figure S3:

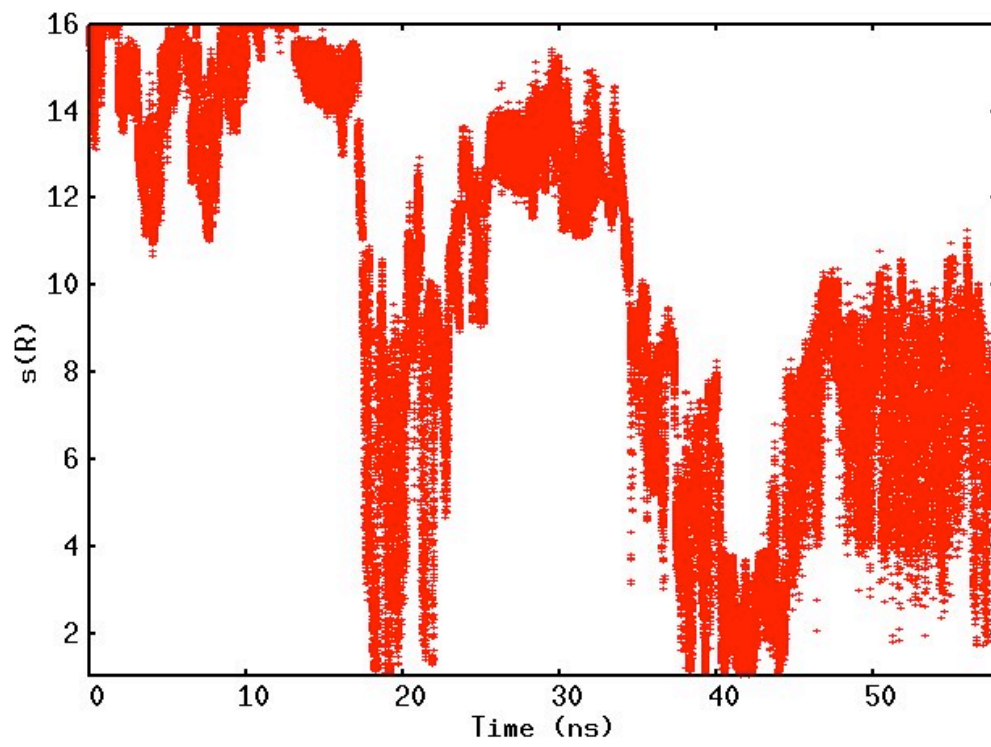

Figure S4:

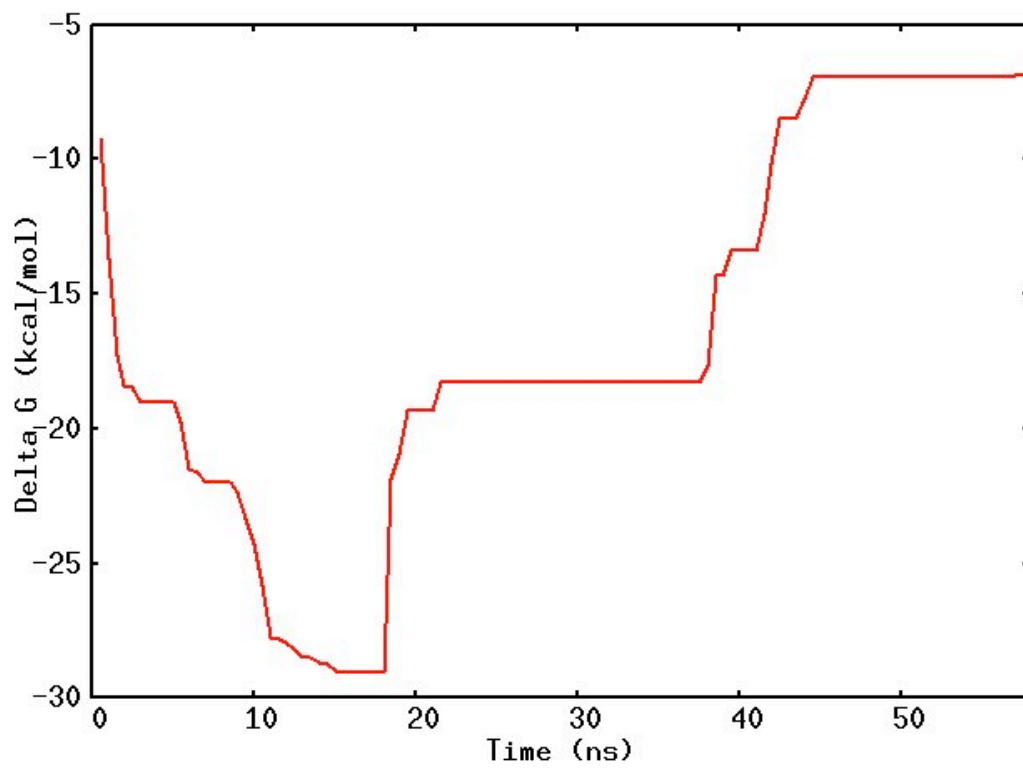

## SUPPORTING REFERENCES

- (1) Laio, A., and F.L. Gervasio. 2008. Metadynamics: a method to simulate rare events and reconstruct the free energy in biophysics, chemistry and material science. *Rep. Prog. Phys.* 71: 126601.
- (2) Barducci, A., G. Bussi, and M. Parrinello. 2008. Well-Tempered Metadynamics: A Smoothly Converging and Tunable Free-Energy Method. *Phys. Rev. Lett.* 100:020603.
