# Supplementary material
Source: PubMed Central journal article supplement (PMC4026775)
Supplement: mmc2.pdf [file mmc2.pdf]

# Conformational Flexibility of Human Casein Kinase Catalytic Subunit Explored by Metadynamics

Aurélien Gouron, Anne Milet, and Helene Jamet\*

DCM, Equipe Chimie Théorique, Université Joseph Fourier Grenoble-I, UMR-CNRS 5250, ICMG, FR 2607, BP 53, 38041 Grenoble Cedex 9, France

**ABSTRACT** Casein kinase CK2 is an essential enzyme in higher organisms, catalyzing the transfer of the  $\gamma$  phosphate from ATP to serine and threonine residues on protein substrates. In a number of animal tumors, CK2 activity has been shown to escape normal cellular control, making it a potential target for cancer therapy. Several crystal structures of human CK2 have been published with different conformations for the CK2 $\alpha$  catalytic subunit. This variability reflects a high flexibility for two regions of CK2 $\alpha$ : the interdomain hinge region, and the glycine-rich loop (p-loop). Here, we present a computational study simulating the equilibrium between three conformations involving these regions. Simulations were performed using well-tempered metadynamics combined with a path collective variables approach. This provides a reference pathway describing the conformational changes being studied, based on analysis of free energy surfaces. The free energies of the three conformations were found to be close and the paths proposed had low activation barriers. Our results indicate that these conformations can exist in water. This information should be useful when designing inhibitors specific to one conformation.

## INTRODUCTION

Kinases are an important protein family involved in numerous pathophysiological processes. CK2 casein kinase catalyzes the transfer of the  $\gamma$  phosphate from ATP to serine and threonine residues on protein substrates. In a number of tumors, CK2 activity escapes normal cellular control, making it a potential target for cancer therapy (1). From a structural point of view, CK2 crystallizes as a tetramer composed of two catalytic alpha subunits (CK2 $\alpha$ ) and two regulatory beta subunits (CK2 $\beta$ ) (2). Although at first glance CK2 $\alpha$  is a rigid molecule not undergoing phosphorylation or other characteristic mechanism to alter its activity, human CK2 $\alpha$  has been shown to display a surprising plasticity of ATP binding elements. Several crystal structures of this protein have been published with different conformations (3–5). Currently, ~45 human CK2 $\alpha$ / $\alpha'$  structures have been deposited in the Protein Data Bank. These conformations indicate that two regions near the ATP binding site are particularly flexible. The first of these regions (hereafter known as the hinge region, see Fig. 1) is formed by the interdomain hinge and the  $\alpha$ D helix connecting the N- and C-terminal domains of CK2 $\alpha$ . The hinge region interacts with the adenine group of the donor ATP molecule. In contrast to maize CK2 $\alpha$ , where the hinge region is always in an open conformation, human CK2 $\alpha$  has both a closed and an open conformation (6). The second highly flexible region in human CK2 $\alpha$  is the p-loop (or glycine-rich loop), located between the first two strands,  $\beta$ 1 and  $\beta$ 2. The two glycine residues in this loop confer its flexibility (7). Finally, a third region at the CK2 $\alpha$ /CK2 $\beta$  interface, the  $\beta$ 4 $\beta$ 5 loop, can also adopt several conformations (8).

Elucidating these conformational rearrangements will provide helpful clues for the design of effective and selective inhibitors. To explain the high number of crystal structures obtained for human CK2 $\alpha$ , Niefind et al. (4,9) propose a dynamic equilibrium between three conformations of the protein in its unbound form. Each of these conformations corresponds to a crystallographic structure obtained experimentally with a given specific activity. Scheme 1 illustrates these three structures. In the central conformation indicated in Scheme 1, the hinge region is closed and two of its amino acids, Asn-118 and Asp-120, can form H-bonds with the ATP ribose moiety of the donor ATP. This results in a ribose's displacement far from its functional position, leading to a partially (in)active state (9). In contrast, the first conformation shown in Scheme 1 is an active conformation, with an open hinge region. The final conformation is a totally inactive CK2 $\alpha$ , with a closed hinge region and collapsed p-loop preventing ATP binding.

Molecular dynamics (MD) has become a widely used, precious tool in many branches of science, particularly biology and chemistry. Thanks to advances in computer technology, we are now able to simulate biological systems and elucidate even complex mechanisms. However, it remains difficult to explore configurations separated by high free energy barriers. In recent years, many methods have been proposed to overcome this limitation of MD. These methods are often based on enhanced sampling techniques (10). We have used the metadynamics method developed by Parrinello and co-workers (11). With this technique, the sampling is accelerated by the addition of repulsive Gaussians to the potential energy surface, for some degrees of freedom known as collective variables (CVs). Several formulations of metadynamics have been developed

Submitted May 7, 2013, and accepted for publication January 23, 2014.

\*Correspondence: [helene.jamet@ujf-grenoble.fr](mailto:helene.jamet@ujf-grenoble.fr)

Editor: Michael Feig.

© 2014 by the Biophysical Society  
0006-3495/14/03/1134/8 \$2.00

<http://dx.doi.org/10.1016/j.bpj.2014.01.031>

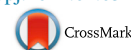

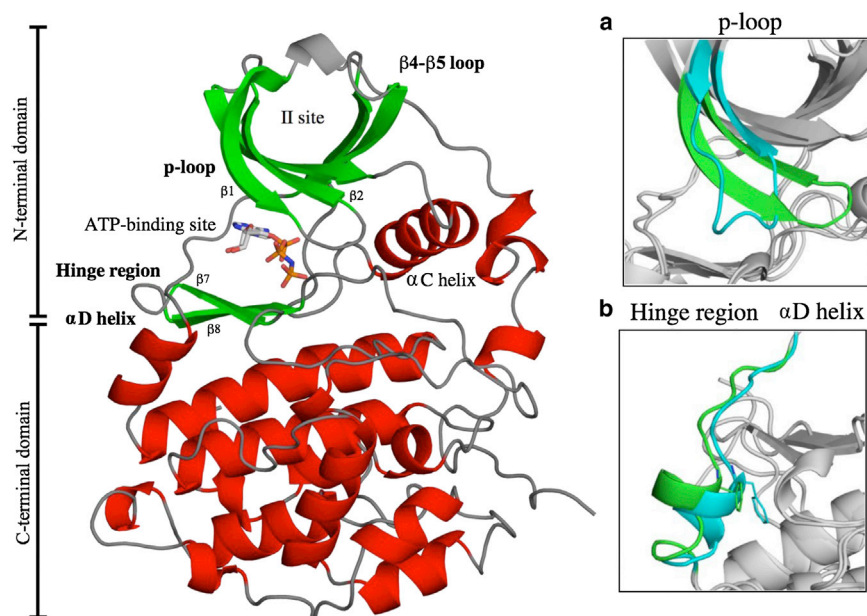

FIGURE 1 Overview of the flexible regions near the ATP binding site of the catalytic subunit of protein kinase in the totally active conformation (PDB: 2PVR). (a) Two conformations are superposed: in blue the collapsed p-loop, in green the stretched p-loop conformation. (b) The two conformations superposed are the closed and the open hinge region conformation respectively in blue and green. Figures were prepared with PYMOL (DeLano Scientific, San Carlos, CA, <http://www.pymol.org>). To see this figure in color, go online.

besides the direct version (11), including the well-tempered variant (12).

This approach has previously been successfully used to simulate rare events and to reconstruct free energy surfaces (FESs) based on a suitably selected set of CVs (13–15). When studying protein conformational changes, specific degrees of freedom must be taken into account. Several strategies have been developed to avoid using a high number of CVs, which increases computational time and makes interpretation of the FES difficult (12,16). The first group of these strategies combines metadynamics with other algorithms, such as parallel tempering (17), bias-exchange (18), etc. The second consists of path-based methods such as the nudged elastic band method, string method, or transition path sampling. For this study, we chose to use metadynamics with path collective variables (PCVs) (19). This method allows us to reconstruct the free energy path connecting an initial and a final state. This approach has been successfully used to study protein conformational rearrangements (20), protein folding (21), drug-receptor interactions (22); and in particular, it has been used to study other kinases, elucidating a closure mechanism (23) and in simulations of inhibitor undocking (24).

CK2 $\alpha$  is a potential target for cancer therapy (1) and we have previously reported a theoretical method to estimate protein-ligand interactions in CK2 $\alpha$  inhibitors (25). In this article, we study the conformational rearrangements

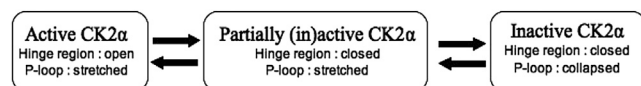

SCHEME 1 Hypothetical equilibrium of CK2 $\alpha$  proposed by Niefind et al. (9)

of the CK2 $\alpha$ . PCVs are used to study the equilibrium of CK2 $\alpha$  proposed by Niefind et al. (4,9), as illustrated in Scheme 1. The work has been separated into two parts: i), the equilibrium between the partially (in)active and the totally inactive state, in which the conformational change is the collapse of the glycine-rich loop; ii), the equilibrium between the totally active and the partially (in)active state, which corresponds to an open-to-close transition of the hinge region. For each equilibrium, a guess path was constructed using metadynamics with several CVs. FESs were then computed using path collective variables. The difference in free energy between the three conformations was evaluated and is discussed, and a mechanism connecting one conformation to another is proposed. These results should be useful in the research of new inhibitors, specific to one conformation.

## COMPUTATIONAL DETAILS

### Setup of the system: MD

The structures chosen to model the conformations from Scheme 1 were obtained from three crystal structures of human CK2 $\alpha$ (1–335) from the Protein Data Bank. The chosen fully active structure with an open hinge region is 2PVR (26). The partially (in)active structure, which has been chosen, is 3H30 (8) with a closed hinge region and a stretched glycine-rich loop. The resolved structure of inactive CK2 $\alpha$  is 3FWQ (7). It has a glycine-rich loop collapsed and a closed hinge region. All the ligands in the remote cavity or in the ATP binding site were removed to study paths without ligand.

The RX structures were equilibrated by preliminary MD. MD were carried out with AMBER10 (27) and the

AMBER force field (amber99SB) (28). In these entire MD, periodic boundary conditions were used. Structures were solvated with a TIP3P water rectangular box. The dimensions of the box were chosen to be at least 10 Å larger than the solute in every direction. No counter ions are needed because the protein is neutral. Long-range electrostatic interactions were computed using the particle-mesh Ewald method with a cutoff value of 10 Å. The time step was set at 1 fs. After minimization, a two-step heating was carried out with small constraints on CK2 $\alpha$ : in a NVT ensemble heat from 0 to 100 K in 50 ps and from 100 to 300 K in 200 ps with a Langevin thermostat with a collision coefficient of 5 ps<sup>-1</sup>. All the constraints were then lifted and MD was run in NPT ensemble at 300 K during 1 ns. After equilibration the final size of the box was 87.7 × 76.1 × 72.7 Å<sup>3</sup>. Root mean-square deviation (RMSD) analysis was performed to check that the structures remained stable.

### Building a guess path: Metadynamics with several CVs

For each equilibrium, we have taken as initial and final structures the RX structures equilibrated by MD simulations as starting points.

In metadynamics, sampling is accelerated by biasing the system through the addition to the potential energy of a sum of repulsive Gaussian terms along the trajectory followed by a set of CVs. This allows the system to explore other regions of the configurational space through low energy paths and prevents from returning in minima, which have already been visited. The sum of Gaussian terms as a function of CVs during the simulation is the negative of the FES (see the [Supporting Material](#) for more details). The choice of CVs is critical to build the correct FES.

Several combinations of relevant CVs were used. For the p-loop equilibrium, the CVs were the distances between Arg-47 and His-160, Arg-47 and Asp-120, Lys-49 and Asp-156, Tyr-50 and Asp-156, and the dihedral angle Arg-47(C $\beta$ , C $\alpha$ , C), Gly-48(N). For the hinge region equilibrium, they were the distances between Thr-119 and Ile-164, Phe-121 and Val-162, and the dihedral angle Phe-121(C $\gamma$ , C $\beta$ , C $\alpha$ , and C). Atoms chosen to calculate the distance for the CVs, parameters of the metadynamics performed with AMBER10 patched with PLUMED (29) are given in the [Supporting Material](#).

With these collective variables, we did not successfully connect the initial and the final conformations. Therefore, these simulations could not be used to build the FESs of the two conformational changes. It justifies the use of path collective variables to describe the transitions. However, these metadynamics gave several intermediate structures between the end points of the two equilibriums. These structures have been useful to construct a first path for the two conformational changes.

### Building of the FES: Metadynamics with PCVs

The first path obtained previously gives us a guess path used to define two orthogonal CVs, called path collective variables, to construct the FESs. These two CVs can be written as

$$s(R) = \frac{1}{P-1} \frac{\sum_{i=1}^P (i-1) e^{-\lambda[R-R(i)]^2}}{\sum_{i=1}^P e^{-\lambda[R-R(i)]^2}},$$

$$z(R) = -\frac{1}{\lambda} \ln \left( \sum_{i=1}^P e^{-\lambda[R-R(i)]^2} \right),$$

$s(R)$  represents the progress along the guess path and has no dimension.  $z(R)$  represents the distance from the guess path and has the dimension of square length.  $P$  is the total number of frames of the guess path. A suitable metric must be defined to calculate the distances between conformations in the configurational space. Among the metrics available, there are the RMSD in Cartesian coordinates, the RMSD in distances, the contact map distance, and a chirality measure. In this study,  $R-R(i)$  is the RMSD in Cartesian coordinates between a set of atoms, which have been carefully chosen for the two equilibrium studied. The RMSD is calculated after alignment of the structures between all the carbon atoms in the carbonyl group of the backbone from residues 20 to 260. This choice is made to ensure a correct alignment with a reasonable time of calculation. The parameter  $\lambda$  is comparable to the inverse of the mean-square displacement between successive frames. It controls the smoothness of the  $s(R)$  function.

The choice of the set of atoms, which was used to calculate the RMSD, is critical. For the p-loop equilibrium, several atoms of the p-loop were considered: C $\alpha$ , N, and C atoms of residues (Arg-43-Phe-54) and some atoms from the side chains of Arg-47, Lys-49, Tyr-50, Asp-120, Asp-156, and His-160. For the second equilibrium, atoms were chosen from the hinge region: several C $\alpha$ , N, and C atoms of residues (Val-112-Leu-128) and (His-160-Ile-164) and the side chains of Asn-117, Asn-118, Thr-119, Asp-120, and Phe-121 (see [Table S1](#) in the [Supporting Material](#)).

The path is defined by a series of frames. They must be taken as equidistant as possible relative to the metric used, to avoid unphysical events on the FES. Other paths than the guess path can be explored, even if the guess one is not optimal. The collective variable  $z(R)$  allows the system to relax to a free energy minimum path. For the two equilibriums, the first path obtained previously and used to define the PCVs contains five frames. Several metadynamics with PCVs were then made to improve the paths and to increase the number of the frames. The final path, for the two equilibriums, contained 16 frames.

First, FESs with different Gaussian parameters had been built with the direct version of metadynamics. The values of the  $\lambda$  parameter were  $3.42 \text{ \AA}^{-2}$  for the p-loop equilibrium and  $4.13 \text{ \AA}^{-2}$  for the hinge equilibrium. The Gaussian deposition rate was 1 ps, the height of 0.7 kcal/mol (simulations have also been performed with 1 and 0.5 kcal/mol), and the Gaussian widths were  $\delta s = 0.3$  and  $\delta z = 0.05 \text{ \AA}^2$ . The SHAKE algorithm (30) was used to constrain all bonds involving hydrogens and the time step was 2 fs. The collective variable,  $z(R)$ , was constrained to be  $<2.0 \text{ \AA}^2$ . It is necessary to save time and prevent the system from going far away from the reference path, but it is large enough to let the system explore conformations different from the guess path.

The convergence of the calculated FES was tested: the free energy difference between two basins, the initial and the final conformations of the equilibrium, was plotted as a function of the simulation progress (31,32). However, the analysis of the convergence rate for the simulations performed in the direct version of metadynamics even after several recrossing events still give us a large deviation and the convergence was not reached. One of the drawbacks of metadynamics in its direct version is that the free energy does not converge to a value but oscillates around the correct result, leading to an average error, which is proportional to the square root of the bias potential deposition rate (33). A solution is to use the well-tempered version of metadynamics (12). In this variant of metadynamics, the height of the Gaussians gradually decreases in each position (see equations in the Supporting Material), which prevents the problem of ‘overfilling’ in one region and reduces errors. Simulations with this variant of metadynamics were performed during respectively 55 and 58 ns for the p-loop and the hinge region equilibria. The FESs were obtained with an adaptive bias of 3300 K, an initial height of 0.7 kcal/mol, and the same parameters as the first simulations.

## RESULTS AND DISCUSSION

To understand the flexibility of CK2 $\alpha$ , the two conformational changes were studied separately. This allowed us to focus on one flexible region of the enzyme at a time. The main steps of the two transitions and the FESs obtained are presented and discussed below.

### Collapse of the p-loop

The first equilibrium studied is between the partially (in) active state, with the p-loop stretched, and the inactive state, with the p-loop collapsed. Throughout this transition the hinge region remains closed. The p-loop is known to be highly flexible and has been shown to be distorted in other kinases (34). Metadynamics analysis with PCVs reveals a FES, which can be divided into several domains, characterized by energy minima and corresponding to the main steps

of the process linking the two states (Fig. 2). Typical structures encountered in the different energy minima, or basins, are illustrated in Fig. 3, *a–e*.

The conformations found in basin A (Fig. 3 *a*) correspond to the inactive state, where the p-loop has collapsed into the ATP cavity, preventing access to the active site. This conformation is induced by the movement of three amino acids in this loop: Arg-47, Lys-49, and Tyr-50. In the collapsed conformation, Lys-49 points at the  $\beta 4/\beta 5$  loop, whereas Arg-47 and Tyr-50 are folded such that they form salt bridges and H-bonds with Asp-120 and His-160 (Arg-47) and with Asp-156 (Tyr-50). In the first step of transformation to the partially (in)active form (Fig. 3 *b*), the H-bond between Tyr-50 and Asp-156 breaks as the distance increases from  $\sim 2$  to 8  $\text{\AA}$ . This corresponds to an upward shift of the p-loop as the Lys-49(C $\alpha$ )-His-160(C $\alpha$ ) distance increases from 10 to 13  $\text{\AA}$ , and a general unfolding of this loop as the Lys-49(C $\alpha$ )-Gly-46(C $\alpha$ ) distance increases from 7 to 8–9  $\text{\AA}$ . The main feature connecting basin B to basin C (Fig. 3 *c*) is the breaking of the H-bonds between Arg-47 and Asp-120, Arg-47 and His-160 (distances increase from 2 to 9  $\text{\AA}$ ). This gives rise to a conformation with a larger p-loop: the distance between C $\alpha$  of Arg-47 and Ser-51 is 7–9  $\text{\AA}$ , whereas it is 5–6  $\text{\AA}$  in both the initial and final states. In basin D (Fig. 3 *d*), the side chain of Arg-47 rotates, changing the orientation of its peptide backbone so that it points at the  $\beta 4/\beta 5$  loop. At the same time, Lys-49 shifts to face in the opposite direction, pointing at His-160/Asp-156. This results in the Lys-49(N $\zeta$ )-His-160(C $\alpha$ ) distance dropping from 14 to 11  $\text{\AA}$ . The final step in this rearrangement (*basin E*, Fig. 3 *e*) is the enlargement of the  $\beta 1$  and  $\beta 2$  strands, with the integration of Arg-47 into strand  $\beta 1$ , and of Glu-52 into strand  $\beta 2$ . Basin E describes the partially (in)active state. In this conformation, the p-loop is stretched and extended as much as possible.

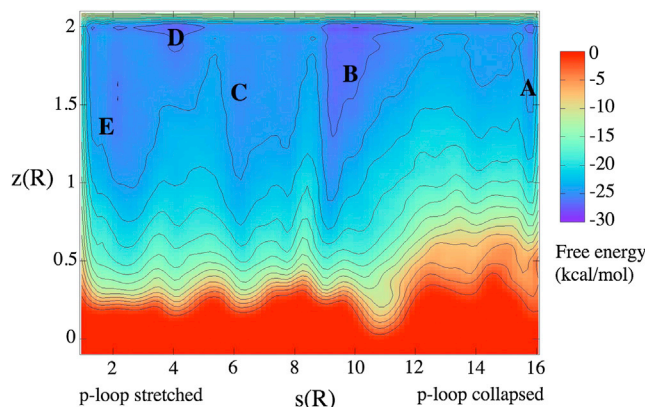

FIGURE 2 FES reconstructed as a function of  $s$  and  $z$  of the p-loop equilibrium. The energy separation between contours is 2 kcal/mol. Basins A–E are referring to the conformations in Fig. 3, *a–e*. To see this figure in color, go online.

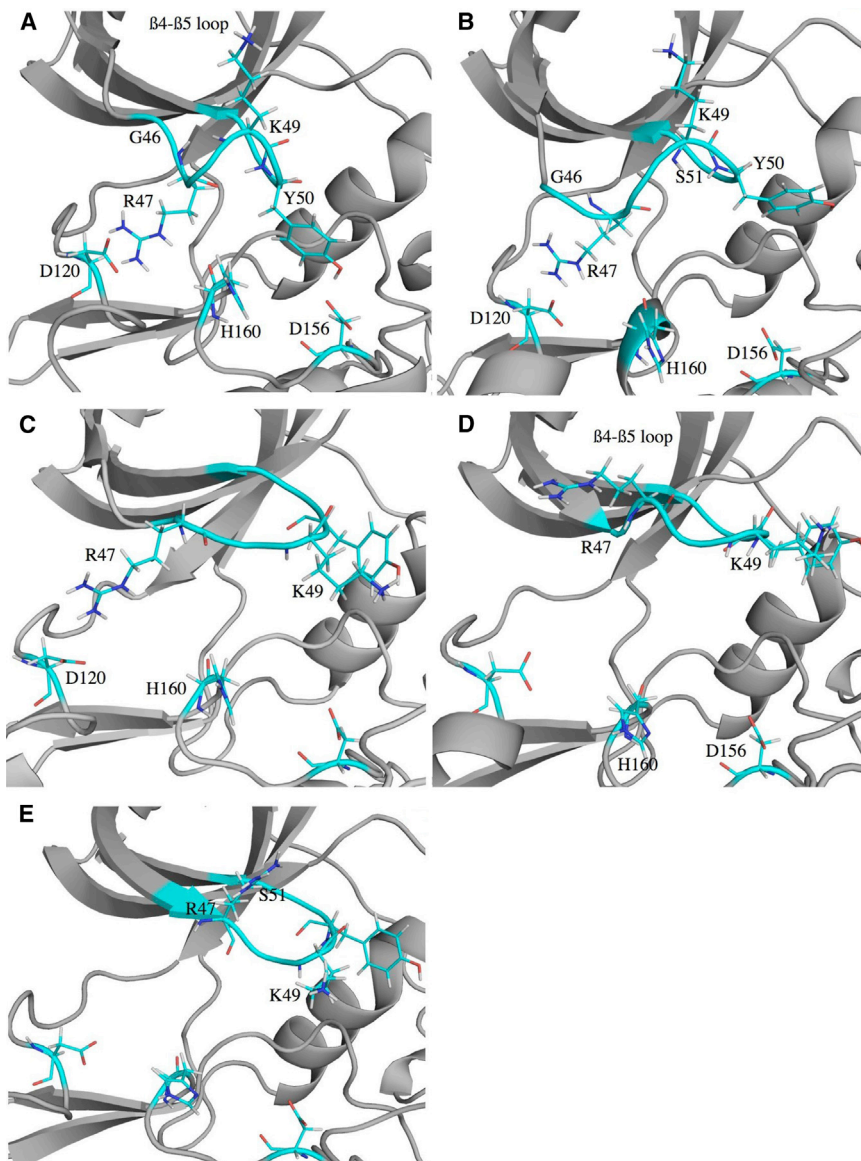

FIGURE 3 (a–e) Steps of the p-loop collapse. Typical structure of basins A–E defined in Fig 2. Figures were prepared with PYMOL (DeLano Scientific, <http://www.pymol.org>). To see this figure in color, go online.

Our simulation reveals the two conformations, with the p-loop collapsed and with the p-loop stretched, to have similar free energy. According to this metadynamics, the stretched loop conformation has approximately the same energy as the collapsed loop conformation. The highest free activation energy barrier is very small,  $\sim 3$  kcal/mol, between basin B and basin C. This transition corresponds to the beginning of Arg-47 rotation, which will ultimately lead to breaking the interactions with Asp-120 and His-160. In the first simulations performed with the direct version of metadynamics and with the same PCVs, energies of the two conformations have been found close and the highest activation barrier was also due to the rotation of Arg-47. These results show that the conformational change to the p-loop of CK2 $\alpha$  is possible in water.

Because the barrier is very low, we have performed a 40 ns dynamics on the partially (in)active structure to see

if the transition can be studied by classical dynamics. No spontaneous conformational change of the p-loop in the collapse conformation has been observed. Similarly, as energy basin B is deep compared with the other basins in the landscape, a MD run of 5 ns was performed on one structure. The stability of the conformation was checked. To compare with initial and final conformations (basins A and E), RMSD during the dynamics was calculated with the same atoms chosen for the path collective variables definition and the equilibrated stretched p-loop conformation as the reference structure. We find an average RMSD value of 3.2 Å, 2.8 Å, and 1 Å for the simulations of respectively the basins A, B, and E, showing the differences between the three structures.

To test the convergence of the calculated FES, the free energy difference between the initial and the final conformations of the equilibrium is plotted as a function of the

simulation progress (Fig. S1 and Fig. S2). The energy difference shown is the difference between the minimum energy in the collapsed and the stretched p-loop conformation. The simulation was performed until two recrossing events occurred leading to a simulation of  $\sim 55$  ns. The estimation of the error is  $\sim 1$ – $2$  kcal/mol.

### Closure of the hinge region

The second equilibrium studied is between the conformation with an open hinge region and the conformation with a closed hinge region. For these two conformations, the p-loop is stretched. The three-dimensional plot of the free energy as a function of the CVs  $s$  and  $z$  and the structures encountered in the different basins are given in Fig. 4.

Basin A corresponds to the closed hinge region conformations (Fig. 4 a). In this conformation, some amino acids from the hinge region are found to penetrate the ATP binding site. Thus, Thr-119 and Phe-121 form H-bonds with Ile-164 and Val-162 on strand  $\beta 7$ . This is possible because Phe-121 can bury its aromatic side chain in a hydrophobic cavity. We suggest a mechanism for the closed-to-open transition beginning with breaking the H-bonds between the hinge region and strand  $\beta 7$ .

The H-bonds Thr-119-Ile-164 and Phe-121-Val-162 break as the distance between residues increases from  $\sim 2$  to  $4$ – $5$  Å. The aromatic side chain of Phe-121 remains in the cavity, in a position called in, whereas the  $\alpha$ D-helix shifts with Thr-119, Asp-120, and Phe-121. These conformations form basin B (Fig. 4 b). To change from here to basin C (Fig. 4 c), Phe-121 rotates from an in position to an out position. Meanwhile, a H-bond in the hinge region, linking the side chain of Gln-123 and Asp-120, is broken, increasing the distance between these residues from 2 to 6 Å. The last step before reaching basin D 4 is rotation of Asn-118 so that its side chain points toward the interior of the active site. The final open hinge conformation (Fig. 4 d) leaves rather more space in the ATP binding site than the closed conformation as Phe-121 points to the surface in its out position.

This metadynamics simulation indicates that the free energy is similar for the initial and final conformations, i.e., those corresponding to basins A and D with the open and closed hinge region. The closed state is 8 kcal/mol lower in free energy than the open state. The first activation barrier for the proposed mechanism is  $\sim 4$  kcal/mol, corresponding to the transition from basins A to B when the  $\alpha$ D-helix shifts with Thr-119, Asp-120, and Phe-121. The second and the highest activation barrier,  $\sim 8$  kcal/mol, is

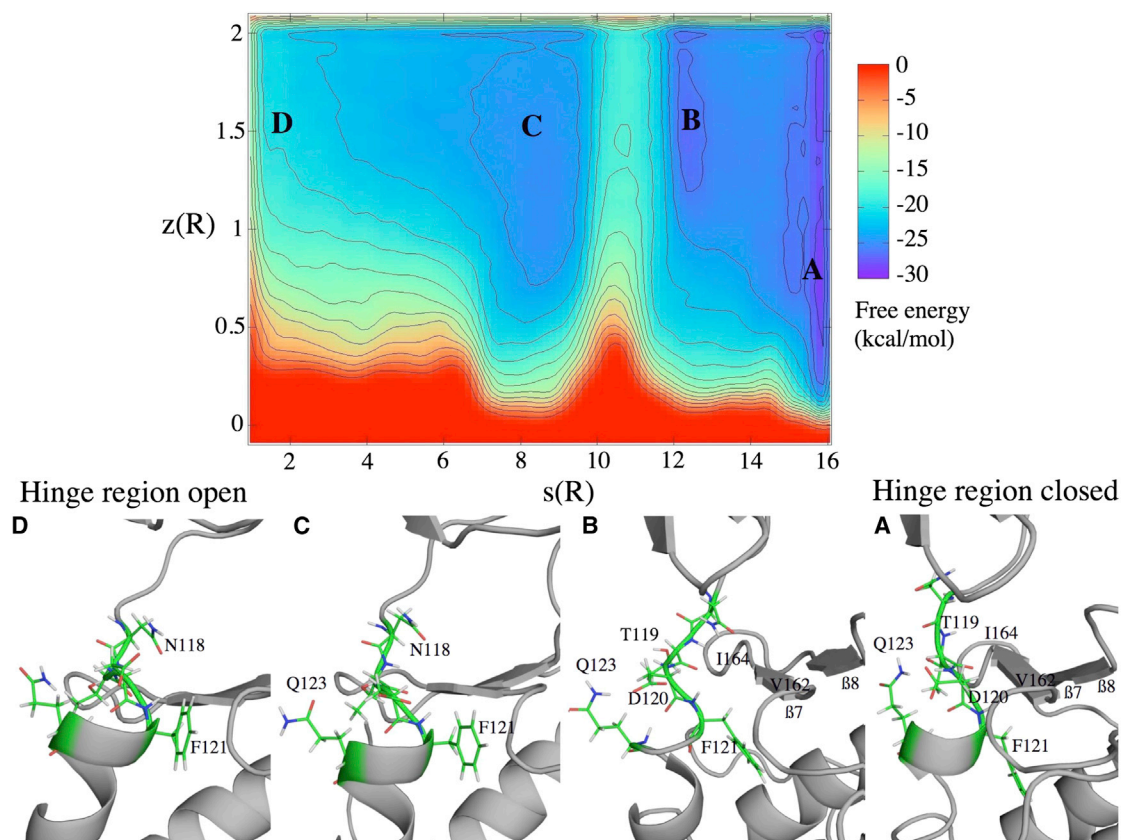

FIGURE 4 FES reconstructed as a function of  $s$  and  $z$  of the hinge region equilibrium. The energy separation between contours is 2 kcal/mol. Basins A–D are referring to the conformations below the FES. Figures were prepared with PYMOL (Delano Scientific, <http://www.pymol.org>). To see this figure in color, go online.

the Phe-121 flip between the basins B to C. For the final basins, C and D, the FES is quite flat. Asn-118 rotation seems to require little energy. Thus, basin D is not clearly delimited. This could be explained by the absence of ligand, leaving a large space in the ATP binding pocket. This leaves Asn-118 free to move. In addition, in conformations with an open hinge region, because the interaction between segment Thr-119-Phe-121 and the  $\beta 7/\beta 8$  strands is weaker than in the closed structures, the regions are more flexible.

For information, in some of the first metadynamics performed with the direct version and with the same PCVs, the rotation of Phe-121 and the shift of the  $\alpha D$ -helix with Thr-119, Asp-120, and Phe-121 were separated, as described previously, whereas in others they occurred at the same time. The convergence assessments of the FES presented in Fig. 4 are given in Fig. S3 and Fig. S4. Consequently, the two conformations are close in free energy and can exist in equilibrium in water.

## CONCLUSION

This study describes metadynamics simulations with path collective variables used to study the flexibility of a human casein kinase, CK2. Two conformational changes to human CK2 $\alpha$  were considered: the collapse of the p-loop, and the open-to-closed transition of the hinge region. Niefind et al. (9) had previously suggested equilibrium between three conformations linking the two functional states. Our simulations indicate that the structure with a stretched p-loop and a closed hinge region has indeed the same free energy as the structure with a collapsed p-loop, and is 8 kcal/mol lower than the conformation with an open hinge region. We suggest a mechanism for these two conformational changes. The highest activation barrier is  $\sim 3$  kcal/mol for the p-loop equilibrium, corresponding to the beginning of Arg rotation. For the hinge region equilibrium, the highest barrier involves a rotation of Phe-121, and requires 8 kcal/mol. Our results indicate that the conformational changes between the three states entail reasonable barriers, and so that the three conformations can exist in water.

Each of the three conformations has a different specific activity: the conformation with the p-loop collapsed is inactive; the conformation with the p-loop stretched and the hinge region closed is partially (in)active; and the conformation with the hinge region opened is active. The results presented here should help in the design of new CK2 inhibitors. Our data indicate that, before the binding interaction, human CK2 $\alpha$  exists as an ensemble of conformations in dynamic equilibrium. The presence of a ligand can influence this equilibrium by stabilizing one of the conformations, as in a conformation selection model (35). Several classes of inhibitors of this enzyme have already been developed (36), some of which target the ATP binding site. Depending on whether and where they form H-bonds, these inhibitors may stabilize the open or the closed hinge region conforma-

tion. Thereby, the hinge region is found in a closed conformation for the CK2 $\alpha^{1-335}$ -resorufin but in an open conformation for the inhibitor CX-4945 and the CK2 $\alpha^{1-325}$ /CK2 $\alpha^{327-350}$ -AMPPN(P) complex (4). Similarly, small molecules could be found that occupy the remote cavity, as CK2 $\beta$ -derivated cyclopeptides, which corresponds to the CK2 $\alpha$ /CK2 $\beta$  interface (37). This type of interaction could stabilize the inactive conformation, where the p-loop is collapsed into the ATP binding site. Thus, new strategies may now emerge in the search for CK2 inhibitors, taking the flexibility of this kinase into account to develop inhibitors selective for one of the three conformations.

## SUPPORTING MATERIAL

Four figures, one table, supporting data, and reference (39) are available at [http://www.biophysj.org/biophysj/supplemental/S0006-3495\(14\)00129-5](http://www.biophysj.org/biophysj/supplemental/S0006-3495(14)00129-5).

## REFERENCES

1. Tawfic, S., S. Yu, ..., K. Ahmed. 2001. Protein kinase CK2 signal in neoplasia. *Histol. Histopathol.* 16:573–582.
2. Niefind, K., B. Guerra, ..., O. G. Issinger. 2001. Crystal structure of human protein kinase CK2: insights into basic properties of the CK2 holoenzyme. *EMBO J.* 20:5320–5331.
3. Papinutto, E., A. Ranchio, ..., R. Battistutta. 2012. Structural and functional analysis of the flexible regions of the catalytic  $\alpha$ -subunit of protein kinase CK2. *J. Struct. Biol.* 177:382–391.
4. Klopffleisch, K., O. G. Issinger, and K. Niefind. 2012. Low-density crystal packing of human protein kinase CK2 catalytic subunit in complex with resorufin or other ligands: a tool to study the unique hinge-region plasticity of the enzyme without packing bias. *Acta Crystallogr. D Biol. Crystallogr.* 68:883–892.
5. Niefind, K., J. Raaf, and O. G. Issinger. 2009. Protein kinase CK2 in health and disease: protein kinase CK2: from structures to insights. *Cell. Mol. Life Sci.* 66:1800–1816.
6. Raaf, J., K. Klopffleisch, ..., K. Niefind. 2008. The catalytic subunit of human protein kinase CK2 structurally deviates from its maize homologue in complex with the nucleotide competitive inhibitor emodin. *J. Mol. Biol.* 377:1–8.
7. Raaf, J., O. G. Issinger, and K. Niefind. 2009. First inactive conformation of CK2  $\alpha$ , the catalytic subunit of protein kinase CK2. *J. Mol. Biol.* 386:1212–1221.
8. Raaf, J., E. Brunstein, ..., K. Niefind. 2008. The CK2 alpha/CK2 beta interface of human protein kinase CK2 harbors a binding pocket for small molecules. *Chem. Biol.* 15:111–117.
9. Niefind, K., and O. G. Issinger. 2010. Conformational plasticity of the catalytic subunit of protein kinase CK2 and its consequences for regulation and drug design. *Biochim. Biophys. Acta.* 1804:484–492.
10. Dellago, C., and P. G. Bolhuis. 2009. Transition path sampling and other advanced simulation techniques for rare events. *Adv. Polym. Sci.* 221:167–233.
11. Laio, A., and M. Parrinello. 2002. Escaping free-energy minima. *Proc. Natl. Acad. Sci. USA.* 99:12562–12566.
12. Barducci, A., G. Bussi, and M. Parrinello. 2008. Well-tempered metadynamics: a smoothly converging and tunable free-energy method. *Phys. Rev. Lett.* 100:020603.
13. Barducci, A., M. Bonomi, and M. Parrinello. 2011. Metadynamics. *Wiley Interdiscip. Rev. Comput. Mol. Sci.* 1:826–843.
14. Michel, C., A. Laio, ..., A. Milet. 2007. Free energy ab initio metadynamics: a new tool for the theoretical study of organometallic

- reactivity? Example of the CC and CH reductive eliminations from Pt(IV) complexes. *Organometallics*. 26:1241–1249.
15. Kannappan, R., C. Bucher, ..., C. Chaix. 2010. Viologen-based redox switchable anion binding receptors. *New J. Chem.* 34:1373–1386.
  16. Leone, V., F. Marinelli, ..., M. Parrinello. 2010. Targeting biomolecular flexibility with metadynamics. *Curr. Opin. Struct. Biol.* 20:148–154.
  17. Bussi, G., F. L. Gervasio, ..., M. Parrinello. 2006. Free-energy landscape for beta hairpin folding from combined parallel tempering and metadynamics. *J. Am. Chem. Soc.* 128:13435–13441.
  18. Piana, S., and A. Laio. 2007. A bias-exchange approach to protein folding. *J. Phys. Chem. B*. 111:4553–4559.
  19. Branduardi, D., F. L. Gervasio, and M. Parrinello. 2007. From A to B in free energy space. *J. Chem. Phys.* 126:054103.
  20. Prakash, M. K., A. Barducci, and M. Parrinello. 2010. Probing the mechanism of pH-induced large-scale conformational changes in dengue virus envelope protein using atomistic simulations. *Biophys. J.* 99:588–594.
  21. Bonomi, M., D. Branduardi, ..., M. Parrinello. 2008. The unfolded ensemble and folding mechanism of the C-terminal GB1  $\beta$ -hairpin. *J. Am. Chem. Soc.* 130:13938–13944.
  22. Favia, A. D., M. Masetti, ..., A. Cavalli. 2011. Substrate binding process and mechanistic functioning of type 1 11 $\beta$ -hydroxysteroid dehydrogenase from enhanced sampling methods. *PLoS ONE*. 6:e25375.
  23. Berteotti, A., A. Cavalli, ..., M. Parrinello. 2009. Protein conformational transitions: the closure mechanism of a kinase explored by atomistic simulations. *J. Am. Chem. Soc.* 131:244–250.
  24. Fidelak, J., J. Juraszek, ..., F. L. Gervasio. 2010. Free-energy-based methods for binding profile determination in a congeneric series of CDK2 inhibitors. *J. Phys. Chem. B*. 114:9516–9524.
  25. Retegan, M., A. Milet, and H. Jamet. 2009. Exploring the binding of inhibitors derived from tetrabromobenzimidazole to the CK2 protein using a QM/MM-PB/SA approach. *J. Chem. Inf. Model.* 49:963–971.
  26. Niefind, K., C. W. Yde, ..., O. G. Issinger. 2007. Evolved to be active: sulfate ions define substrate recognition sites of CK2 $\alpha$  and emphasize its exceptional role within the CMGC family of eukaryotic protein kinases. *J. Mol. Biol.* 370:427–438.
  27. Case, D. A., T. A. Darden, ..., P. A. Kollman. 2008. AMBER 10. University of California, San Francisco.
  28. Hornak, V., R. Abel, ..., C. Simmerling. 2006. Comparison of multiple Amber force fields and development of improved protein backbone parameters. *Proteins*. 65:712–725.
  29. Bonomi, M., D. Branduardi, ..., M. Parrinello. 2009. PLUMED: A portable plugin for free-energy calculations with molecular dynamics. *Comput. Phys. Commun.* 180:1961–1972.
  30. Ryckaert, J. P., G. Ciccotti, and H. J. C. Berendsen. 1997. Numerical integration of the Cartesian equations of motion of a system with constraints: molecular dynamics of *n*-alkanes. *J. Comput. Phys.* 23:327–341.
  31. Bussi, G., A. Laio, and M. Parrinello. 2006. Equilibrium free energies from nonequilibrium metadynamics. *Phys. Rev. Lett.* 96:090601.
  32. Provasi, D., and M. Filizola. 2010. Putative active states of a prototypic g-protein-coupled receptor from biased molecular dynamics. *Biophys. J.* 98:2347–2355.
  33. Pfandtner, J., D. Branduardi, ..., G. A. Voth. 2009. Nucleotide-dependent conformational states of actin. *Proc. Natl. Acad. Sci. USA*. 106:12723–12728.
  34. Patel, R. Y., and R. J. Doerksen. 2010. Protein kinase-inhibitor database: structural variability of and inhibitor interactions with the protein kinase P-loop. *J. Proteome Res.* 9:4433–4442.
  35. Grant, B. J., A. A. Gorfe, and J. A. McCammon. 2010. Large conformational changes in proteins: signaling and other functions. *Curr. Opin. Struct. Biol.* 20:142–147.
  36. Prudent, R., C. F. Sautel, and C. Cochet. 2010. Structure-based discovery of small molecules targeting different surfaces of protein-kinase CK2. *Biochim. Biophys. Acta*. 1804:493–498.
  37. Laudet, B., V. Mouchel, ..., C. Cochet. 2008. Identification of chemical inhibitors of protein-kinase CK2 subunit interaction. *Mol. Cell. Biochem.* 316:63–69.
  38. Reference deleted in proof.
  39. Laio, A., and F. L. Gervasio. 2008. Metadynamics: a method to simulate rare events and reconstruct the free energy in biophysics, chemistry and material science. *Rep. Prog. Phys.* 71:126601.



# **Conformational Flexibility of Human Casein Kinase Catalytic Subunit Explored by Metadynamics**

Aurélie Gouron, Anne Milet, and Helene Jamet\*

DCM, Equipe Chimie Théorique UMR-5250, Université Joseph Fourier Grenoble-I, Grenoble Cedex, France

## SUPPORTING MATERIAL

**Details of free energy surface reconstruction.** After metadynamics simulations, the free energy surfaces are reconstructed with the sum of the Gaussians added during the simulation as a function of CVs:

$$V_G(S(x),t) = w \sum_{\substack{t'=\tau_G, 2\tau_G, \dots \\ t' < t}} \exp\left(-\frac{(S(x) - S(x(t')))^2}{2\delta s^2}\right) \quad (1)$$

where  $V_G$  corresponds to the sum of the Gaussians centred along the trajectory ( $x$ ) in the space of the CVs,  $S(x(t'))$  is the value taken by the CV at time  $t'$ ,  $w$  is the Gaussian height,  $\delta s$  is the Gaussian width which is deposited every  $\tau_G$ .

The opposite of the sum of the Gaussians added during the simulation converges to the free energy surface  $\lim_{t \rightarrow \infty} -V_G(S(x),t) \approx F(S(x))$ .

In the well-tempered variant of metadynamics (2), the height of the Gaussian terms is

$w = w_0 e^{-\frac{V_G(S,t)}{k_B \Delta T}}$  with  $w_0$  the initial Gaussian height and  $\Delta T$  is the difference between the fictitious temperature of the CV and the temperature of the simulation. The ratio  $(T+\Delta T)/T$  is referred as bias factor.  $\Delta T \rightarrow 0$  corresponds to a ordinary MD and  $\Delta T \rightarrow \infty$  to a standard metadynamics. The bias potential does not oscillate around the FES value but slowly converges.

$$\lim_{t \rightarrow \infty} -V_G(S(x),t) \approx \frac{\Delta T}{T + \Delta T} F(S(x))$$

**Parameters of metadynamics and CVs chosen to generate the first guess path.** 6 metadynamics were performed for the p-loop equilibrium and 3 for the hinge region equilibrium. For the p-loop equilibrium, metadynamics were performed with the collapsed or the stretched p-loop conformations as starting point and with the Gaussian deposition rate of 1ps. The CVs chosen were the distance between the atoms:

d1 : Arg47 : HE– His160 : O (along the H-bond)

d2: Lys49 : NZ – Asp156:CG

d3: Tyr50:HO– Asp156:OD2 (along the H-bond)

d4 : Arg47:CZ – Asp120:CG

and the dihedral angle : an1: Arg47(C $\beta$ , C $\alpha$ ,C),Gly48(N)

| CV1 | CV2 | H<br>(kcal/mol) | $\partial$ CV1 | $\partial$ CV2 | Simulation<br>time | Starting<br>point |
|-----|-----|-----------------|----------------|----------------|--------------------|-------------------|
| d1  | d2  | 0.3             | 0.4 A          | 1 A            | 0.9 ns             | collapsed         |
| d1  | d3  | 0.3             | 0.8 A          | 0.5 A          | 0.35 ns            | collapsed         |
| d2  | d4  | 0.3             | 1 A            | 2 A            | 0.75 ns            | collapsed         |
| d1  | an1 | 0.3             | 1 A            | 0.35 rad       | 0.6 ns             | collapsed         |
| d1  | d2  | 0.3             | 1.5 A          | 2 A            | 0.45 ns            | stretched         |
| d1  | an1 | 0.3             | 1.5 A          | 0.35 rad       | 1.0 ns             | stretched         |

For the hinge region equilibrium, the open and closed hinge region were used as starting point and the deposition rate was 1 ps or 0.25 ps for the metadynamics with 2 or 3 CVs respectively. The CVs chosen were the distance between the atoms:

d5: Thr119:O - Ile164:H (along the H-bond)

d6: Phe121:H - Val162:O (along the H-bond)

and the dihedral angle an2 : Phe121(C $\gamma$ , C $\beta$ , C $\alpha$ , C)

| CV1 | CV2 | CV3 | H<br>(kcal/mol) | $\partial$ CV1 | $\partial$ CV2 | $\partial$ CV3 | Simulation<br>time | Starting<br>point |
|-----|-----|-----|-----------------|----------------|----------------|----------------|--------------------|-------------------|
| d5  | an2 |     | 0.3             | 0.3            | 0.25           |                | 0.5 ns             | open              |
| d5  | an2 | d6  | 0.3             | 0.3            | 0.25           | 0.3            | 0.5 ns             | open              |
| d5  | an2 |     | 0.3             | 0.3            | 0.25           |                | 0.4 ns             | closed            |

The parameters of the Gaussians for these metadynamics were rude because the aim is to provide intermediate frames to define the path collective variables.

**Table S1.** Atoms included in the PCV calculation.

**Figure S1.** For the p-loop equilibrium, the variable  $s(R)$ , the progression along the guess path, is plotted as a function of simulation time.

**Figure S2.** Convergence rate of free energy for the p-loop equilibrium. The difference of free energy between the two minima, the collapsed and the stretched p-loop conformations, is plotted as a function of simulation time.

**Figure S3.** For the hinge region equilibrium, the variable  $s(R)$ , the progression along the guess path, is plotted as a function of simulation time.

**Figure S4.** Convergence rate of free energy for the hinge region equilibrium. The difference of free energy between the two minima, the closed and the open hinge region conformations, is plotted as a function of simulation time.

Table S1:

For the collapsed p-loop equilibrium, the RMSD calculated for the path collective variable is between 54 atoms from the p-loop region:

Arg42 N, Ca, C ; Lys43 N, Ca, C ; Leu44, N, Ca, C ; Gly45 N, Ca, C ; Arg46 N, Ca, Cb, Cg, C ; Gly47 N, Ca, C ; Lys48 N, Ca, Cb, Cg, C ; Tyr49 N, Ca, Cb, Cg, C ; Ser50 N, Ca, C ; Glu51 N, Ca, C ; Val52 N, Ca, C ; Phe53 N, Ca, C

For the closure of the hinge region equilibrium, the RMSD calculated for the path collective variable is between 63 atoms:

Val111 N, Ca ; Phe112 N, Ca ; Glu113 N, Ca ; Hie114 N, Ca ; Val115 N, Ca, C ; Asn116 N, Ca, Cb, C ; Asn117 N, Ca, Cb, C ; Thr118 N, Ca, Cb, C ; Asp119 N, Ca, Cb, C ; Phe120 N, Ca, Cb, Cg, Cd1, Cd2, Ce1, Ce2, C ; Lys 121 N, Ca, C ; Gln122 N, Ca, C ; Leu123 N, Ca ; Tyr124 N, Ca ; Gln125 N, Ca ; Thr126 N, Ca ; Leu127 N, Ca

Figure S1:

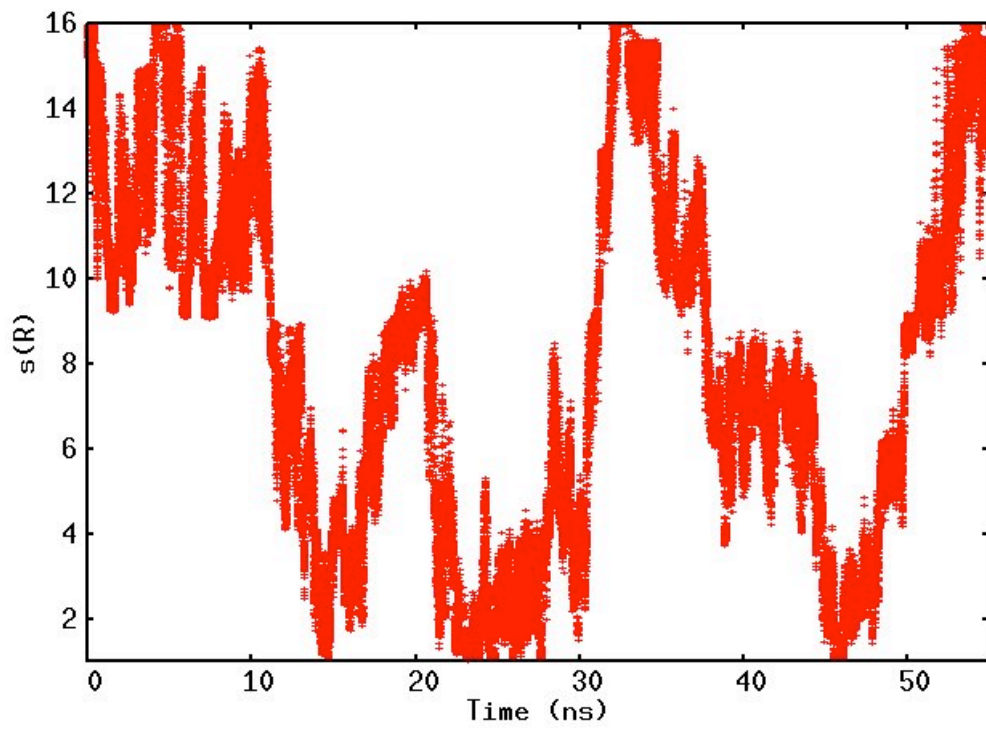

Figure S2:

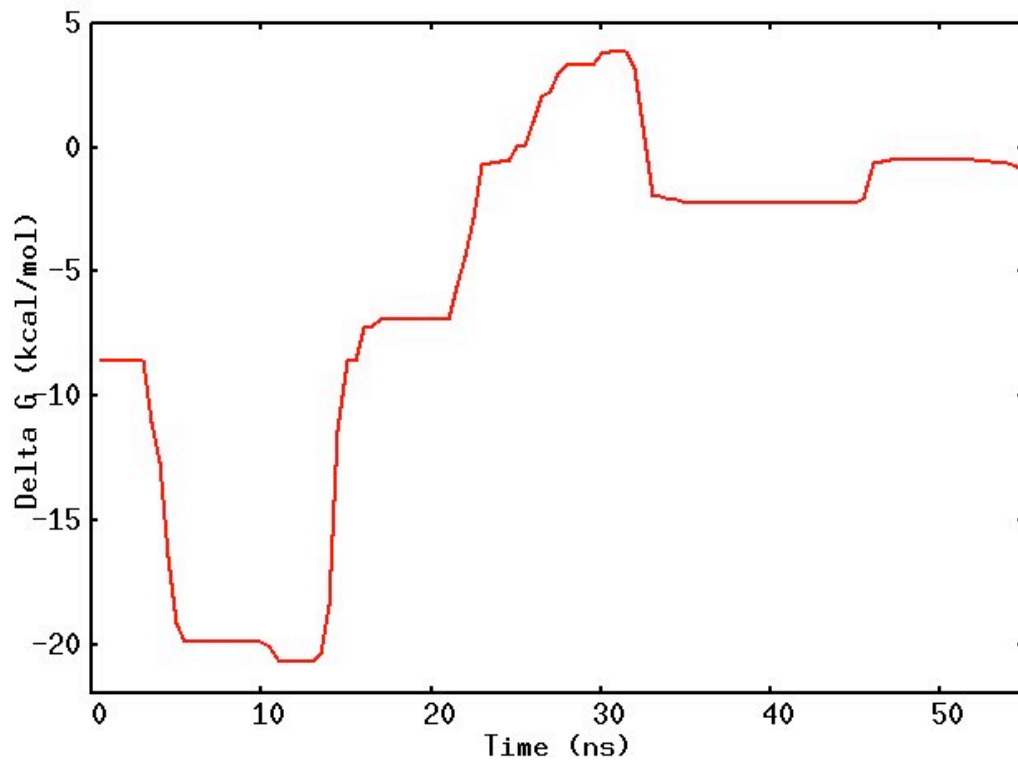

Figure S3:

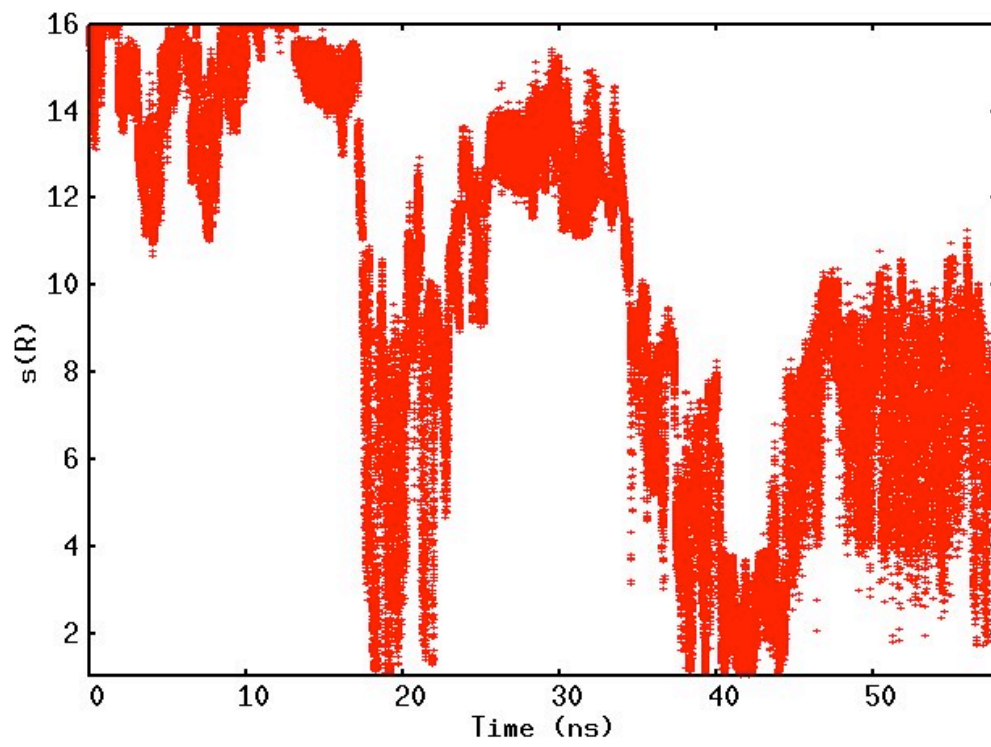

Figure S4:

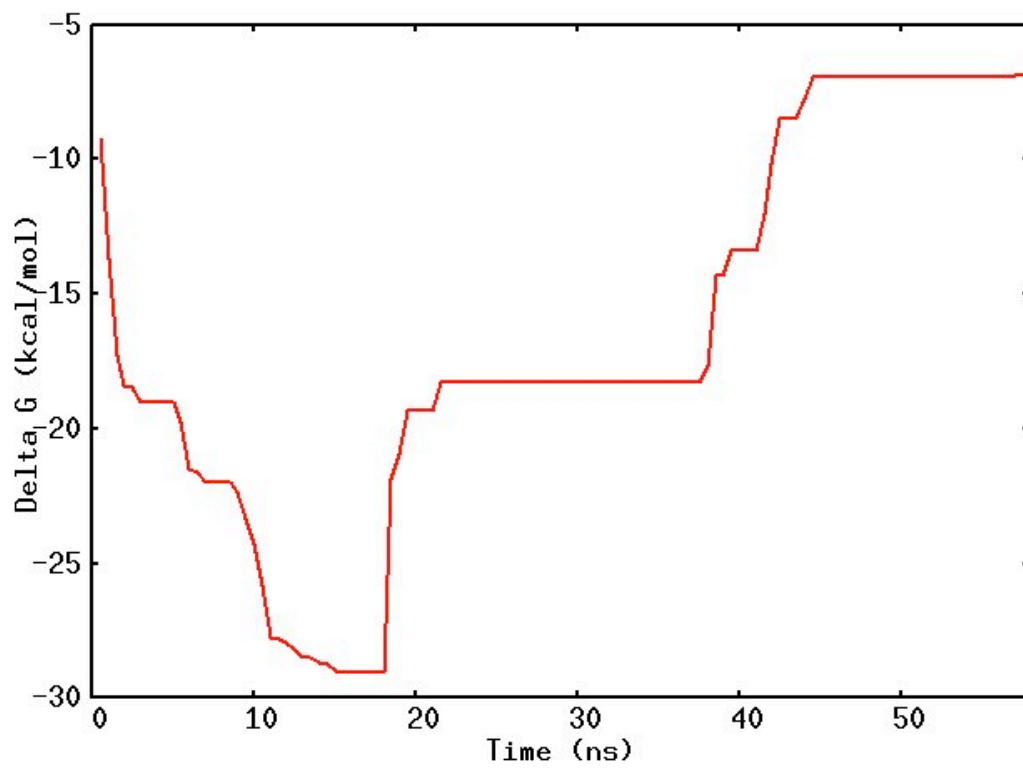

## SUPPORTING REFERENCES

- (1) Laio, A., and F.L. Gervasio. 2008. Metadynamics: a method to simulate rare events and reconstruct the free energy in biophysics, chemistry and material science. *Rep. Prog. Phys.* 71: 126601.
- (2) Barducci, A., G. Bussi, and M. Parrinello. 2008. Well-Tempered Metadynamics: A Smoothly Converging and Tunable Free-Energy Method. *Phys. Rev. Lett.* 100:020603.
